# Supplementary material
Source: publisher figshare collection journal article supplement (https://acs.figshare.com/ndownloader/files/22764650)
Supplement: Supplementary file 1 [file 22764650]

## Sheet: sheet1
Table S12. Distribution of tet(E), Tn6433, plasmids pAeca1-a and pAeca2 in bacterial taxa isolated from the reactor.
Stages	Species	Isolates	tet(E)	pAeca1-a	pAeca2	Tn6433
OTC-0	Bacillus sp.	T0-1
	Bacillus amyloliquefaciens	T0-2
	Bacillus subtilis	T0-3
	Bacillus subtilis	T0-4
	Bacillus subtilis	T0-5
	Bacillus methylotrophicus	T0-6
	Bacillus safensis	T0-7
	Bacillus subtilis	T0-8
	Bacillus toyonensis	T0-9
	Bacillus cereus	T0-10
	Bacillus cereus	T0-11
	Bacillus anthracis	T0-12
	Bacillus thuringiensis	T0-13
	Bacillus subtilis	T0-14
	Comamonas testosteroni	T0-15
	Comamonas testosteroni	T0-16
	Microbacterium arabinogalactanolyticum	T0-17
	Stenotrophomonas acidaminiphila	T0-18
	Klebsiella oxytoca	T0-19
	Comamonas testosteroni	T0-21
	Comamonas sp.	T0-22
	Azonexus caeni	T0-23
	Azonexus caeni	T0-24
	Bacillus eiseniae	T0-26	+
	Lactococcus chungangensis	T0-27	+
	Lactococcus raffinolactis	T0-28	+
	Lactococcus chungangensis	T0-29	+
	Cloacibacterium rupense	T0-30	+
	Corynebacterium callunae	T0-31
	Pseudoxanthomonas mexicana	T0-32	+
	Paracoccus yeei	T0-33	+
	Pseudoxanthomonas mexicana	T0-34
	Bacillus licheniformis	T0-35
	Bacillus pumilus	T0-36
	Chryseobacterium lactis	T0-37
	Acidovorax temperans	T0-38
	Stenotrophomonas acidaminiphila	T0-39
	Cloacibacterium normanense	T0-40
	Cloacibacterium normanense	T0-41
	Stenotrophomonas acidaminiphila	T0-42
	Cloacibacterium normanense	T0-43
	Pseudoxanthomonas mexicana	T0-44
	Cloacibacterium normanense	T0-45
	Bacillus amyloliquefaciens	T0-46
	Paracoccus yeei	T0-47
	Azonexus fungiphilus	T0-48
	Leucobacter sp.	T0-50
	Rhodococcus sp.	T0-51
	Luteococcus japonicus	T0-52
	Rhodococcus erythropolis	T0-53
	Simplicispira limi	T0-54
	Leucobacter chromiireducens	T0-55
	Azonexus fungiphilus	T0-56
	Cloacibacterium normanense	T0-57
	Acidovorax soli	T0-58
	Acidovorax facilis	T0-59
	Luteococcus japonicus	T0-60
	Cloacibacterium normanense	T0-61
	Azonexus caeni	T0-62
	Bacillus nealsonii	T0-63
	Acinetobacter kyonggiensis	T0-64
	Paracoccus yeei	T0-65
	Bacillus sporothermodurans	T0-66
	Bacillus subtilis	R0-1
	Bacillus subtilis	R0-2
	Bacillus sp.	R0-3
	Bacillus sp.	R0-4
	Bacillus amyloliquefaciens	R0-5
	Bacillus subtilis	R0-6
	Bacillus cereus	R0-7
	Bacillus oryzaecorticis	R0-8
	Bacillus amyloliquefaciens	R0-9
	Bacillus sp.	R0-10
	Bacillus thuringiensis	R0-11
	Bacillus subtilis	R0-12
	Bacillus subtilis	R0-13
	Bacillus subtilis	R0-14
	Bacillus subtilis	R0-15
	Bacillus altitudinis	R0-16
	Klebsiella oxytoca	R0-17
	Bacillus subtilis	R0-18
	Pantoea agglomerans	R0-19
	Paracoccus yeei	R0-20
	Paracoccus yeei	R0-21
	Paracoccus yeei	R0-22
	Chryseobacterium gleum	R0-23
	Chryseobacterium rhizoplanae	R0-24
	Microbacterium oxydans	R0-25
	Flavobacterium lutivivi	R0-26
	Azonexus caeni	R0-27
	Azonexus caeni	R0-28
	Bacillus aryabhattai	R0-29
	Raoultella planticola	R0-30
	Stenotrophomonas sp.	R0-31
	Bacillus cereus	R0-32
	Paracoccus yeei	R0-33
	Aeromonas veronii	R0-34
	Aeromonas veronii	R0-35
	Pseudoxanthomonas mexicana	R0-36
	Zoogloea oryzae	R0-38
	Cloacibacterium normanense	R0-39
	Cloacibacterium normanense	R0-40
	Stenotrophomonas acidaminiphila	R0-42	+
	Azonexus caeni	R0-43
	Stenotrophomonas acidaminiphila	R0-44
	Cloacibacterium normanense	R0-45
	Lactococcus raffinolactis	R0-46
	Arsenicibacter rosenii	R0-47
	Stenotrophomonas acidaminiphila	R0-48
	Bacillus idriensis	R0-49
	Acidovorax wautersii	R0-50
	Comamonas testosteroni	R0-51	+
	Acidovorax wautersii	R0-52
	Cloacibacterium normanense	R0-53
	Cloacibacterium normanense	R0-54
OTC-0.1	Bacillus cereus	T0.1-5
	Comamonas sp.	T0.1-6
	Lactococcus raffinolactis	T0.1-7
	Leucobacter chromiireducens	T0.1-8
	Aeromonas sobria	T0.1-9	+
	Aeromonas media	T0.1-10	+
	Bacillus subtilis	T0.1-11
	Microbacterium arabinogalactanolyticum	T0.1-12
	Aeromonas media	T0.1-13
	Aeromonas media	T0.1-14
	Microbacterium azadirachtae	T0.1-15
	Lactococcus raffinolactis	T0.1-16
	Stenotrophomonas acidaminiphila	T0.1-17
	Chryseobacterium lactis	T0.1-18
	Aeromonas media	T0.1-19
	Streptococcus parauberis	T0.1-20
	Gordonia neofelifaecis	T0.1-22
	Leucobacter denitrificans	T0.1-23
	Leucobacter chromiireducens	T0.1-24
	Soonwooa buanensis	T0.1-25
	Rheinheimera chironomi	T0.1-26
	Leucobacter chromiireducens	T0.1-27
	Brevundimonas vesicularis	T0.1-28
	Bacillus sp.	T0.1-29
	Stenotrophomonas acidaminiphila	T0.1-30
	Microbacterium flavum	T0.1-31
	Bacillus methylotrophicus	T0.1-32
	Bacillus methylotrophicus	T0.1-33
	Bacillus amyloliquefaciens	T0.1-35
	Aeromonas media	T0.1-36
	Rhodococcus jialingiae	T0.1-37
	Stenotrophomonas acidaminiphila	T0.1-38
	Microbacterium oxydans	T0.1-39
	Acidovorax temperans	R0.1-1
	Microbacterium azadirachtae	R0.1-2
	Chryseobacterium lactis	R0.1-3
	Microbacterium lacticum	R0.1-4
	Lactococcus chungangensis	R0.1-6
	Brevundimonas vesicularis	R0.1-8
	Lactococcus chungangensis	R0.1-9
	Microbacterium lacticum	R0.1-10
	Microbacterium mangrovi	R0.1-11
	Rhodococcus jialingiae	R0.1-12
	Stenotrophomonas acidaminiphila	R0.1-13	+
	Lactococcus raffinolactis	R0.1-14
	Lactococcus chungangensis	R0.1-15
	Deinococcus radiotolerans	R0.1-17
	Runella limosa	R0.1-18
	Acidovorax wautersii	R0.1-19
	Xanthobacter flavus	R0.1-20
	Leucobacter chromiireducens	R0.1-21
	Mycobacterium fortuitum	R0.1-22
	Stenotrophomonas acidaminiphila	R0.1-23
	Pseudomonas otitidis	R0.1-24
	Xanthobacter flavus	R0.1-25
	Xanthobacter flavus	R0.1-26
	Aeromonas sobria	R0.1-27	+		+
	Bacillus sp.	R0.1-28
	Methyloversatilis discipulorum	R0.1-29	+		+
	Gordonia neofelifaecis	R0.1-30
	Bacillus methylotrophicus	R0.1-32
OTC-1	Shewanella putrefaciens	T1-3	+
	Lactococcus chungangensis	T1-5
	Lactococcus chungangensis	T1-6
	Raoultella terrigena	T1-7
	Pseudomonas migulae	T1-8	+
	Stenotrophomonas acidaminiphila	T1-9
	Delftia acidovorans	T1-10
	Thermomonas koreensis	T1-11
	Simplicispira limi	T1-12
	Trichococcus flocculiformis	T1-13
	Brevundimonas faecalis	T1-14
	Comamonas koreensis	T1-15
	Acidovorax facilis	T1-16
	Simplicispira limi	T1-17
	Pseudoxanthomonas mexicana	T1-18
	Bacillus sp.	T1-19
	Aeromonas media	T1-20	+
	Bacillus methylotrophicus	T1-21
	Bacillus methylotrophicus	T1-22
	Bacillus methylotrophicus	T1-23
	Bacillus subtilis	T1-24
	Bacillus subtilis	T1-25
	Bacillus subtilis	T1-26
	Bacillus mojavensis	T1-27
	Bacillus methylotrophicus	T1-28
	Bacillus cereus	T1-29
	Bacillus cereus	T1-30
	Leucobacter chromiireducens	T1-31
	Chryseobacterium balustinum	T1-32
	Bacillus subtilis	T1-33
	Bacillus amyloliquefaciens	T1-34
	Cloacibacterium normanense	T1-35
	Gordonia neofelifaecis	T1-36
	Staphylococcus hominis	T1-37
	Hydrogenophaga pseudoflava	T1-38
	Brevibacterium epidermidis	T1-39
	Rhodococcus sp.	T1-40
	Aeromonas media	T1-43
	Acinetobacter johnsoni	T1-44
	Microbacterium oxydans	T1-45
	Cloacibacterium normanense	T1-46
	Leucobacter denitrificans	T1-47
	Bacillus pumilus	T1-48	+
	Comamonas testosteroni	T1-49
	Aeromonas media	T1-50	+
	Microbacterium arabinogalactanolyticum	T1-51	+
	Raoultella terrigena	R1-1	+
	Bacillus subtilis	R1-2
	Chryseobacterium rhizoplanae	R1-3
	Chryseobacterium zeae	R1-4	+
	Bacillus cereus	R1-5
	Bacillus anthracis	R1-6
	Bacillus cereus	R1-7
	Bacillus vallismortis	R1-8
	Pseudomonas migulae	R1-9	+
	Pseudomonas migulae	R1-10	+
	Bacillus amyloliquefaciens	R1-11
	Bacillus subtilis	R1-12
	Xanthobacter flavus	R1-13	+
	Xanthobacter flavus	R1-14
	Lactococcus chungangensis	R1-15
	Flavobacterium hibernum	R1-16
	Microbacterium arabinogalactanolyticum	R1-17
	Aeromonas media	R1-18	+			+
	Pseudomonas gessardii	R1-19
	Bacillus subtilis	R1-20
	Xanthobacter flavus	R1-21
	Pseudomonas putida	R1-22
	Delftia acidovorans	R1-23
	Gordonia neofelifaecis	R1-24
	Comamonas testosteroni	R1-25
	Aeromonas media	R1-26
	Brevundimonas faecalis	R1-27
	Bacillus sp.	R1-28
	Lactococcus chungangensis	R1-29
	Caulobacter segnis	R1-30
	Microbacterium lacticum	R1-31
	Runella defluvii	R1-32
	Paracoccus huijuniae	R1-33
	Mycobacterium peregrinum	R1-34
	Delftia acidovorans	R1-35
	Cloacibacterium normanense	R1-36
	Xanthobacter flavus	R1-37
	Caulobacter segnis	R1-38
	Simplicispira limi	R1-39
	Xanthobacter flavus	R1-40
	Xanthobacter flavus	R1-41
	Hydrogenophaga flava	R1-42
	Ideonella dechloratans	R1-43
	Xanthobacter autotrophicus	R1-44
	Hydrogenophaga pseudoflava	R1-45
	Microbacterium oxydans	R1-46
	Pseudoxanthomonas japonensis	R1-47
OTC-5	Aeromonas media	T5-1
	Aeromonas media	T5-2	+			+
	Aeromonas media	T5-3	+
	Aeromonas veronii	T5-4	+		+
	Aeromonas media	T5-5	+			+
	Aeromonas media	T5-6	+			+
	Aeromonas veronii	T5-7	+
	Aeromonas media	T5-8	+
	Aeromonas media	T5-9	+
	Aeromonas veronii	T5-10	+		+
	Aeromonas media	T5-11
	Aeromonas media	T5-12
	Raoultella terrigena	T5-13
	Aeromonas media	T5-14
	Brevundimonas faecalis	T5-15
	Acinetobacter johnsonii	T5-16
	Aeromonas media	T5-17	+
	Chryseobacterium rhizoplanae	T5-18
	Aeromonas veronii	T5-19	+		+
	Aeromonas veronii	T5-20	+
	Brevundimonas faecalis	T5-21
	Stenotrophomonas acidaminiphila	T5-22
	Stenotrophomonas acidaminiphila	T5-23
	Micrococcus yunnanensis	T5-24
	Aeromonas media	T5-25
	Aeromonas media	T5-26
	Aeromonas media	T5-27
	Aeromonas media	T5-28
	Aeromonas media	T5-29
	Aeromonas media	T5-30
	Aeromonas media	T5-31	+
	Bacillus anthracis	T5-32
	Bacillus subtilis	T5-33
	Bacillus tequilensis	T5-34
	Bacillus methylotrophicus	T5-35
	Bacillus subtilis	T5-36
	Microbacterium flavescens	T5-37
	Microbacterium oxydans	T5-38
	Gordonia neofelifaecis	T5-39
	Bacillus subtilis	T5-40
	Gordonia neofelifaecis	T5-41
	Paracoccus huijuniae	T5-42
	Leucobacter chromiireducens	T5-43
	Paracoccus huijuniae	T5-44
	Hydrogenophaga pseudoflava	T5-45
	Hydrogenophaga pseudoflava	T5-46
	Microbacterium oxydans	T5-47
	Shinella zoogloeoides	T5-48
	Stenotrophomonas acidaminiphila	T5-49
	Leucobacter denitrificans	T5-50
	Lactococcus chungangensis	T5-51
	Lactococcus chungangensis	T5-52
	Lactococcus chungangensis	T5-53
	Lactococcus chungangensis	T5-54
	Lactococcus raffinolactis	T5-55
	Lactococcus raffinolactis	T5-56
	Lactococcus raffinolactis	T5-57
	Lactococcus chungangensis	T5-58
	Lactococcus chungangensis	T5-59
	Lactococcus chungangensis	T5-60
	Lactococcus chungangensis	T5-61
	Lactococcus chungangensis	T5-62
	Lactococcus chungangensis	T5-63
	Lactococcus chungangensis	T5-64
	Lactococcus chungangensis	T5-65
	Lysinimicrobium mangrovi	T5-66
	Comamonas testosteroni	T5-67
	Bacillus cereus	R5-1
	Bacillus cereus	R5-2
	Bacillus cereus	R5-3
	Bacillus cereus	R5-4
	Bacillus cereus	R5-5
	Bacillus subtilis	R5-6
	Bacillus sp.	R5-7
	Bacillus megaterium	R5-8
	Raoultella terrigena	R5-9
	Raoultella terrigena	R5-10
	Aeromonas media	R5-11	+
	Acinetobacter johnsonii	R5-12
	Aeromonas media	R5-13
	Aeromonas veronii	R5-14	+		+
	Acinetobacter johnsonii	R5-15
	Aeromonas media	R5-16	+
	Aeromonas media	R5-17
	Aeromonas sobria	R5-18	+		+
	Aeromonas media	R5-19	+			+
	Aeromonas media	R5-20	+			+
	Aeromonas media	R5-21
	Aeromonas media	R5-22
	Aeromonas media	R5-23	+
	Acinetobacter johnsonii	R5-24
	Bacillus tequilensis	R5-25
	Aeromonas media	R5-27	+			+
	Comamonas testosteroni	R5-28
	Gemmobacter fontiphilus	R5-29
	Gemmobacter fontiphilus	R5-30
	Acinetobacter johnsonii	R5-32
	Hydrogenophaga pseudoflava	R5-33
	Hydrogenophaga pseudoflava	R5-34
	Hydrogenophaga pseudoflava	R5-35
	Sphingopyxis chilensis	R5-36
	Flavobacterium hibernum	R5-37
	Flavobacterium hibernum	R5-38
	Gemmobacter fontiphilus	R5-39
	Runella defluvii	R5-40
	Hydrogenophaga flava	R5-41
	Hydrogenophaga pseudoflava	R5-42
	Hydrogenophaga pseudoflava	R5-43
	Aeromonas media	R5-44	+
	Hydrogenophaga pseudoflava	R5-45
	Cloacibacterium normanense	R5-46
	Dechloromonas hortensis	R5-47
	Dechloromonas hortensis	R5-48
	Cloacibacterium normanense	R5-49
	Cloacibacterium normanense	R5-50
	Chryseobacterium sp.	R5-51
	Chryseobacterium sp.	R5-52
	Lactococcus chungangensis	R5-53
	Lactococcus chungangensis	R5-54
	Lactococcus raffinolactis	R5-55
	Lactococcus chungangensis	R5-56
	Comamonas testosteroni	R5-57
OTC-25	Bacillus amyloliquefaciens	T25-1
	Bacillus axarquiensis	T25-2
	Bacillus amyloliquefaciens	T25-3
	Bacillus methylotrophicus	T25-4
	Bacillus methylotrophicus	T25-5
	Bacillus methylotrophicus	T25-6
	Bacillus methylotrophicus	T25-7
	Bacillus subtilis	T25-8
	Bacillus vallismortis	T25-9
	Bacillus tianshenii	T25-10
	Bacillus amyloliquefaciens	T25-11
	Bacillus subtilis	T25-13
	Bacillus methylotrophicus	T25-14
	Bacillus vallismortis	T25-15
	Bacillus thuringiensis	T25-16
	Bacillus flexus	T25-17
	Aeromonas caviae	T25-18	+	+		+
	Aeromonas caviae	T25-19	+	+		+
	Raoultella terrigena	T25-20
	Aeromonas media	T25-21	+			+
	Paracoccus huijuniae	T25-22
	Aeromonas media	T25-23	+		+	+
	Aeromonas caviae	T25-24	+	+		+
	Aeromonas media	T25-25	+	+		+
	Aeromonas caviae	T25-26	+	+		+
	Pseudomonas putida	T25-27
	Pseudomonas plecoglossicida	T25-28
	Pseudomonas putida	T25-29
	Aeromonas caviae	T25-30	+	+		+
	Pseudomonas plecoglossicida	T25-31
	Pseudomonas plecoglossicida	T25-32
	Aeromonas media	T25-33	+			+
	Aeromonas media	T25-34
	Aeromonas caviae	T25-35	+	+	+	+
	Aeromonas caviae	T25-36	+	+		+
	Aeromonas caviae	T25-37	+	+	+	+
	Aeromonas caviae	T25-38	+	+		+
	Aeromonas caviae	T25-39	+	+	+	+
	Aeromonas caviae	T25-40	+
	Aeromonas caviae	T25-41	+	+		+
	Sporosarcina soli	T25-42
	Aeromonas caviae	T25-43	+	+		+
	Aeromonas caviae	T25-44	+	+		+
	Pseudomonas putida	T25-46
	Pseudomonas sp.	T25-47
	Bacillus tequilensis	T25-48
	Lactococcus chungangensis	T25-49
	Lactococcus chungangensis	T25-50
	Lactococcus chungangensis	T25-51
	Lactococcus chungangensis	T25-52
	Lactococcus chungangensis	T25-53
	Lactococcus chungangensis	T25-54
	Lactococcus chungangensis	T25-55
	Lactococcus chungangensis	T25-56
	Chryseobacterium rhizoplanae	T25-57
	Aeromonas caviae	T25-58	+	+	+	+
	Stenotrophomonas acidaminiphila	T25-59
	Hydrogenophaga pseudoflava	T25-60
	Hydrogenophaga pseudoflava	T25-61
	Hydrogenophaga pseudoflava	T25-62	+
	Bosea robiniae	T25-63
	Hydrogenophaga electricum	T25-64
	Stenotrophomonas acidaminiphila	T25-65
	Brevundimonas poindexterae	T25-66
	Oryzobacter terrae	T25-67
	Pseudoxanthomonas mexicana	T25-68
	Hydrogenophaga electricum	T25-69
	Comamonas granuli	T25-70
	Brevundimonas poindexterae	T25-71
	Brevundimonas olei	T25-72
	Hydrogenophaga electricum	T25-73
	Stenotrophomonas acidaminiphila	T25-74
	Stenotrophomonas acidaminiphila	T25-75
	Pseudoxanthomonas mexicana	T25-76
	Sporosarcina soli	T25-77
	Micrococcus antarcticus	T25-78
	Aeromonas media	T25-79	+			+
	Raoultella terrigena	R25-1
	Aeromonas caviae	R25-2	+	+		+
	Aeromonas media	R25-3	+
	Aeromonas media	R25-4	+	+		+
	Aeromonas caviae	R25-5	+
	Aeromonas caviae	R25-6	+
	Aeromonas caviae	R25-7	+	+	+	+
	Pseudomonas putida	R25-8
	Pseudomonas putida	R25-9
	Pseudomonas plecoglossicida	R25-10
	Bacillus amyloliquefaciens	R25-14
	Bacillus cereus	R25-15
	Bacillus cereus	R25-16
	Bacillus cereus	R25-17
	Bacillus subtilis	R25-18
	Bacillus cereus	R25-19
	Bacillus subtilis	R25-20
	Bacillus methylotrophicus	R25-21
	Bacillus methylotrophicus	R25-22
	Bacillus subtilis	R25-23
	Xanthobacter flavus	R25-24
	Aeromonas media	R25-25	+	+		+
	Aeromonas media	R25-26	+			+
	Pseudomonas sp.	R25-27
	Hydrogenophaga pseudoflava	R25-29
	Hydrogenophaga pseudoflava	R25-30
	Gemmobacter fontiphilus	R25-31
	Gemmobacter fontiphilus	R25-32
	Hydrogenophaga pseudoflava	R25-33
	Hydrogenophaga pseudoflava	R25-34
	Gemmobacter fontiphilus	R25-35
	Hydrogenophaga pseudoflava	R25-36
	Hydrogenophaga pseudoflava	R25-37
	Gemmobacter fontiphilus	R25-38
	Aeromonas caviae	R25-39	+	+	+	+
	Gemmobacter fontiphilus	R25-40
	Aeromonas caviae	R25-41	+
	Aeromonas caviae	R25-42	+
	Aeromonas caviae	R25-43	+
	Rheinheimera texasensis	R25-44
	Flavobacterium aquaticum	R25-45
	Comamonas granuli	R25-46
	Stenotrophomonas acidaminiphila	R25-47
	Rheinheimera texasensis	R25-48
	Chitinimonas prasina	R25-49
	Chitinimonas prasina	R25-50
	Xanthobacter flavus	R25-51
	Xanthobacter flavus	R25-52
	Amaricoccus kaplicensis	R25-53
	Xanthobacter flavus	R25-54
	Thermomonas fusca	R25-55
	Sphingosinicella xenopeptidilytica	R25-56
	Cloacibacterium normanense	R25-57
	Gemmobacter fontiphilus	R25-58
	Lactococcus chungangensis	R25-59
	Lactococcus chungangensis	R25-60
	Lactococcus chungangensis	R25-61
	Cloacibacterium normanense	R25-62
	Cloacibacterium normanense	R25-63
	Bacillus amyloliquefaciens	R25-64
OTC-50	Bacillus cereus	T50-1
	Aeromonas hydrophila	T50-2	+
	Aeromonas salmonicida	T50-3	+	+	+	+
	Raoultella terrigena	T50-4
	Pseudomonas sp.	T50-5
	Pseudomonas sp.	T50-6
	Raoultella terrigena	T50-7
	Raoultella terrigena	T50-8
	Pseudomonas sp.	T50-9
	Pseudomonas sp.	T50-10
	Delftia sp.	T50-11
	Pseudomonas sp.	T50-12
	Comamonas koreensis	T50-13
	Comamonas koreensis	T50-14
	Comamonas koreensis	T50-15
	Delftia acidovorans	T50-16
	Pseudomonas sp.	T50-17
	Raoultella terrigena	T50-18
	Raoultella terrigena	T50-19
	Stenotrophomonas maltophilia	T50-20
	Stenotrophomonas acidaminiphila	T50-21
	Raoultella terrigena	T50-22
	Flavobacterium lacus	T50-23
	Shinella granuli	T50-24
	Pseudoxanthomonas mexicana	T50-25
	Flavobacterium lacus	T50-26
	Carnobacterium mobile	T50-27
	Hydrogenophaga palleronii	T50-28
	Sphingopyxis chilensis	T50-29
	Shinella zoogloeoides	T50-30
	Brevundimonas poindexterae	T50-31
	Pedobacter ureilyticus	T50-32
	Pseudoxanthomonas mexicana	T50-33
	Lactococcus chungangensis	T50-35
	Comamonas koreensis	T50-36
	Comamonas koreensis	T50-37
	Hydrogenophaga atypica	T50-38
	Leucobacter chromiireducens	T50-39
	Raoultella terrigena	T50-40
	Raoultella terrigena	T50-41
	Lactococcus chungangensis	T50-42
	Shinella granuli	T50-43
	Microbacterium oxydans	T50-44
	Pedobacter nanyangensis	T50-45
	Lactococcus chungangensis	T50-46
	Carnobacterium mobile	T50-47
	Pseudomonas sp.	T50-48
	Raoultella terrigena	T50-49
	Raoultella terrigena	T50-50
	Raoultella terrigena	T50-51
	Comamonas koreensis	T50-52
	Bacillus cereus	R50-1
	Pseudomonas sp.	R50-2
	Comamonas koreensis	R50-3
	Arthrobacter nicotinovorans	R50-4
	Raoultella terrigena	R50-5
	Pseudomonas sp.	R50-7
	Pseudomonas sp.	R50-8
	Comamonas koreensis	R50-9
	Microbacterium sp.	R50-10		+
	Ensifer adhaerens	R50-11
	Microbacterium oxydans	R50-12
	Comamonas koreensis	R50-13
	Pseudomonas sp.	R50-14
	Lactococcus chungangensis	R50-15
	Shinella granuli	R50-16
	Microbacterium oxydans	R50-17
	Sphingopyxis chilensis	R50-18
	Brevundimonas poindexterae	R50-19
	Lactococcus chungangensis	R50-20
	Acidovorax facilis	R50-21
	Aeromonas media	R50-22	+	+		+
	Comamonas koreensis	R50-23
	Pseudomonas sp.	R50-24
	Raoultella terrigena	R50-25
	Shinella granuli	R50-26
	Pseudomonas sp.	R50-27
	Paracoccus aestuarii	R50-28
	Rhizobium galegae	R50-29
	Kocuria halotolerans	R50-30
	Luteimonas aestuarii	R50-31
	Brevibacterium epidermidis	R50-32
	Rhodococcus yunnanensis	R50-33
	Ensifer adhaerens	R50-34
	Comamonas koreensis	R50-35
	Brevundimonas poindexterae	R50-36
	Lactococcus chungangensis	R50-37
	Shinella granuli	R50-38
	Lactococcus chungangensis	R50-39
	Sphingopyxis chilensis	R50-40
	Microbacterium oxydans	R50-41
	Pseudomonas putida	R50-42
